# Supplementary material
Source: publisher figshare collection journal article supplement (https://sage.figshare.com/ndownloader/files/16769978)
Supplement: Supplementary file 1 [file 16769978]

**Supplemental Table 5. Morphological outcomes of infant monkeys exposed to vedolizumab *in utero*.**

| Parameter,                               | Group 1         |                      | Group 2          |                      | Group 3           |                      |
|------------------------------------------|-----------------|----------------------|------------------|----------------------|-------------------|----------------------|
| mean (SD),                               | Vedolizumab     |                      | Vedolizumab      |                      | Vedolizumab       |                      |
| cm <sup>a</sup>                          | 0 mg/kg/day Q2W |                      | 10 mg/kg/day Q2W |                      | 100 mg/kg/day Q2W |                      |
|                                          | PPD 1           | PPD 181 <sup>b</sup> | PPD 1            | PPD 181 <sup>b</sup> | PPD 1             | PPD 181 <sup>b</sup> |
|                                          | N=7             | N=7                  | N=7              | N=7                  | N=10              | N=10                 |
| Distance between eyes                    | 1.7 (0.1)       | 2.1 (0.1)            | 1.8 (0.2)        | 2.3 (0.1)            | 1.8 (0.1)         | 2.3 (0.1)            |
| Crown-rump length                        | 16.0 (1.3)      | 25.3 (0.9)           | 17.1 (0.7)       | 25.4 (1.3)           | 17.2 (0.6)        | 27.0 (2.1)           |
| Crown-heel length                        | 25.2 (1.5)      | 39.1 (2.2)           | 25.3 (1.1)       | 40.1 (2.0)           | 25.9 (1.1)        | 40.9 (1.8)           |
| Tail length                              | 19.9 (2.1)      | 26.5 (2.4)           | 21.1 (2.2)       | 28.9 (2.8)           | 20.6 (1.6)        | 29.3 (4.3)           |
| Chest circumference                      | 12.8 (0.5)      | 19.1 (1.0)           | 13.1 (0.5)       | 18.9 (1.2)           | 12.9 (0.7)        | 19.3 (0.9)           |
| Rt arm length                            | 8.4 (0.9)       | 14.6 (1.4)           | 8.1 (1.0)        | 15.7 (1.0)           | 8.5 (0.9)         | 15.4 (1.3)           |
| Lt arm length                            | 8.0 (1.5)       | 14.3 (1.4)           | 8.1 (1.1)        | 15.0 (1.2)           | 8.4 (1.1)         | 15.3 (1.1)           |
| Rt leg length                            | 6.3 (0.8)       | 11.4 (0.9)           | 6.3 (0.6)        | 12.2 (3.1)           | 6.7 (0.7)         | 11.6 (1.0)           |
| Lt leg length                            | 6.2 (0.9)       | 11.2 (1.0)           | 6.2 (0.7)        | 11.9 (3.3)           | 6.5 (0.6)         | 11.6 (1.0)           |
| Ano-genital distance, males <sup>c</sup> | 3.6 (-)         | 6.3 (-)              | 3.5 (0.7)        | 6.2 (0.9)            | 3.3 (1.0)         | 5.9 (0.9)            |

---

Ano-genital

distance,            1.9 (0.2)      3.2 (0.6)      1.5 (-)      2.7 (-)      1.7 (0.4)      3.0 (0.7)

females<sup>d</sup>

---

Lt, left; PPD, postpartum day; Rt, right; Q2W, every 2 weeks.

<sup>a</sup> Some measurements included only 6 infants in Group 1 and only 9 infants in Group 3.

<sup>b</sup> PPD 181 ± 1 day.

<sup>c</sup> There were 2 males in Group 1, and 5 each in Groups 2 and 3.

<sup>d</sup> There were 5 females in Group 1, 2 females in Group 2, and 5 females in group 3.
